# Supplementary material for: The role of surface stoichiometry in NO2gas sensing using single and multiple nanobelts of tin oxide
Source: Royal Society of Chemistry journal article supplement (doi:10.1039/d1cp00662b), 2021-01-01
Supplement: d1cp00662b1.pdf [file d1cp00662b1.pdf]

## SUPPLEMENTARY INFORMATION: The Role of Surface Stoichiometry in NO<sub>2</sub> Gas Sensing Using Single and Multiple Nanobelts of Tin Oxide

*Mateus G. Masteghin*<sup>a,b</sup>, *Ranilson A. Silva*<sup>b</sup>, *David C. Cox*<sup>a</sup>, *Denis R. M. Godoi*<sup>b</sup>, *S. Ravi P.*

*Silva*<sup>a,\*</sup>, *Marcelo O. Orlandi*<sup>b,\*</sup>

<sup>a</sup> Advanced Technology Institute, University of Surrey, Guildford, GU2 7XH, UK.

<sup>b</sup> Department of Physical-Chemistry, São Paulo State University, Araraquara, 14800-900, Brazil.

\*corresponding authors: [s.silva@surrey.ac.uk](mailto:s.silva@surrey.ac.uk) (S.R.P. Silva), and [marcelo.orlandi@unesp.br](mailto:marcelo.orlandi@unesp.br) (M.O. Orlandi).

### METHODS

#### ***Carbothermal reduction synthesis***

The starting material was a 1g mixture of SnO<sub>2</sub> powder (Sigma-Aldrich, São Paulo, Brazil, 99.9% purity) and carbon black (Union Carbide, São Paulo, Brazil, >99% purity) in the molar ratio of 1.5:1. The crucible containing the initial mixture was inserted into the center of the tube furnace which was heated to 1135 °C using a heating rate of 10 °C min<sup>-1</sup>. The furnace was then held at that temperature for 75 min. In order to obtain the reduced SnO nanobelts, a constant flux of N<sub>2</sub> (150 cm<sup>3</sup> min<sup>-1</sup>) was used; and, to obtain the Sn<sub>3</sub>O<sub>4</sub> and SnO<sub>2</sub>, a constant flux of N<sub>2</sub> (160 cm<sup>3</sup> min<sup>-1</sup>) was upheld during the entire synthesis together with an oxygen counter flow (0.6 cm<sup>3</sup> min<sup>-1</sup>) starting when the temperature reached 900 °C. At the end of the synthesis, the materials were retrieved from inside the alumina tube. The SnO nanobelts formed during the synthesis under reducing atmosphere were separated from the SnO micro-disks by a decantation process, and the Sn<sub>3</sub>O<sub>4</sub> and SnO<sub>2</sub> formed in a mixed atmosphere were separated by their color and final position. The Sn<sub>3</sub>O<sub>4</sub> presents itself as a yellowish material which has been formed closer to the center of the tube, while the white colored SnO<sub>2</sub> nanobelts were closer to the O<sub>2</sub> gas inlet. In addition, a greyish SnO<sub>2</sub> was also formed and was located in a region between the Sn<sub>3</sub>O<sub>4</sub> and the white colored SnO<sub>2</sub>.

## EXTRA RESULTS

### *Band-gap determination by photocurrent measurements*

Photocurrent measurements are a powerful tool to obtain the optical properties of semiconducting materials since it does not require the need to find the intercept of the linear part of the graph with the energy axis (as in the Tauc-plot <sup>1</sup>) once the band-gap is obtained by the mean value of the Gauss fitting on the photocurrent peak. This current peak appears as a result of the stimulation of the electrons lying at the valence band maximum to the conduction band minimum, where the delocalized carriers will be contributing to a conductivity increasing at wavelengths corresponding to the band-gap value.<sup>2</sup>

Comparing Fig. S1a with Fig. S1b, one can see a behaviour difference between the SnO<sub>2</sub> and the Sn<sub>3</sub>O<sub>4</sub>, respectively, in which the later presented the so-called persistent photoconductance.<sup>3</sup> This effect can be a result of the band bending generated when the material was exposed to the dry air flow - allowing the adsorption/chemisorption of molecules on its surface - and it is highly sensitive to the diameter of the nanowires, which is smaller for the Sn<sub>3</sub>O<sub>4</sub>.<sup>4,5</sup>

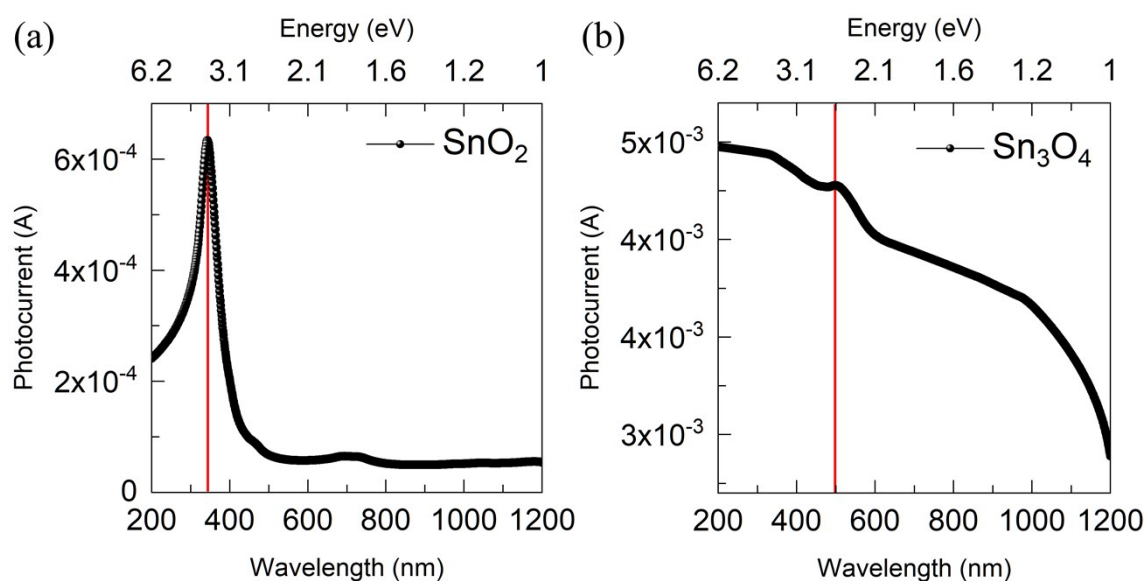

**Fig. S1.** Photocurrent measurements for the (a) white colored SnO<sub>2</sub> nanobelts, and (b) Sn<sub>3</sub>O<sub>4</sub> nanobelts. Optical band-gaps of 3.6 eV and 2.5 eV have been obtained for the SnO<sub>2</sub> and Sn<sub>3</sub>O<sub>4</sub>, respectively.

### Raman measurements of the SnO, and the grey SnO<sub>2</sub> nanobelts

The Raman spectrum of the SnO nanobelts can be seen in Fig. S2. One can see a majority of the SnO phase, indicated by the E<sub>1g</sub> and A<sub>1g</sub> vibrational modes at 114 cm<sup>-1</sup> and 211 cm<sup>-1</sup>, respectively, and another E<sub>1g</sub> mode at 450 cm<sup>-1</sup>.<sup>6-8</sup> The peaks assigned as Sn<sub>3</sub>O<sub>4</sub> (two A<sub>g</sub> modes at 77 cm<sup>-1</sup> and 141 cm<sup>-1</sup>, and two B<sub>g</sub> modes at 94 cm<sup>-1</sup> and 170 cm<sup>-1</sup>) and Sn<sub>2</sub>O<sub>3</sub> (a B<sub>g</sub> mode at 160 cm<sup>-1</sup>) are most probably related to oxygen adsorbed/chemisorbed on the SnO surface.<sup>8-10</sup> It is possible to see the mentioned minor phases on the Raman spectrum because it is affected by both the local bonding and the long-range arrangement.<sup>8</sup> Further characterization (XRD and TEM) of the SnO nanobelts obtained by the carbothermal reduction method can be found in the works of Suman *et al.*<sup>11</sup> and Orlandi *et al.*<sup>12</sup>.

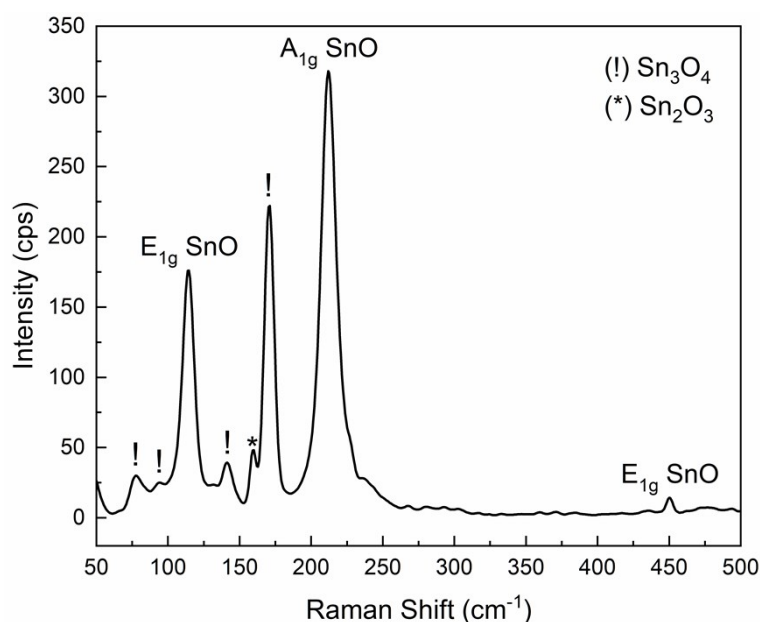

**Fig. S2.** Raman spectrum for the SnO nanobelts showing a major SnO phase indicated by the A<sub>1g</sub> and E<sub>1g</sub> vibrational modes, and minor Sn<sub>3</sub>O<sub>4</sub> and Sn<sub>2</sub>O<sub>3</sub> clusters indicated by the “!” and “\*”, respectively.

Looking at Fig. S3 one can observe that in addition to the vibrational modes assigned to the white SnO<sub>2</sub> in Fig. 1a, the grey SnO<sub>2</sub> presents extra peaks corresponding to Sn<sub>3</sub>O<sub>4</sub> clusters at 94 cm<sup>-1</sup> (B<sub>g</sub>), 132 cm<sup>-1</sup> (B<sub>g</sub>), and 170 cm<sup>-1</sup> (B<sub>g</sub>); besides Sn<sub>2</sub>O<sub>3</sub> clusters at 235 cm<sup>-1</sup> (A<sub>g</sub>), and 542 cm<sup>-1</sup> (A<sub>g</sub>). Liu *et al.*<sup>13</sup> showed that after annealing SnO<sub>2</sub> particles with oxygen flow, the peak attributed here to the Sn<sub>2</sub>O<sub>3</sub> A<sub>g</sub> mode (235 cm<sup>-1</sup>) disappears, while the peak at 170 cm<sup>-1</sup> for the white SnO<sub>2</sub> (B<sub>g</sub> mode) shifts to lower Raman shift values.<sup>13</sup> Those differences are

attributed to O<sub>2</sub> vacancies,<sup>13</sup> which is reasonable bearing in mind that the grey SnO<sub>2</sub> was formed in inner regions of the tube with lower amount of O<sub>2</sub> available.

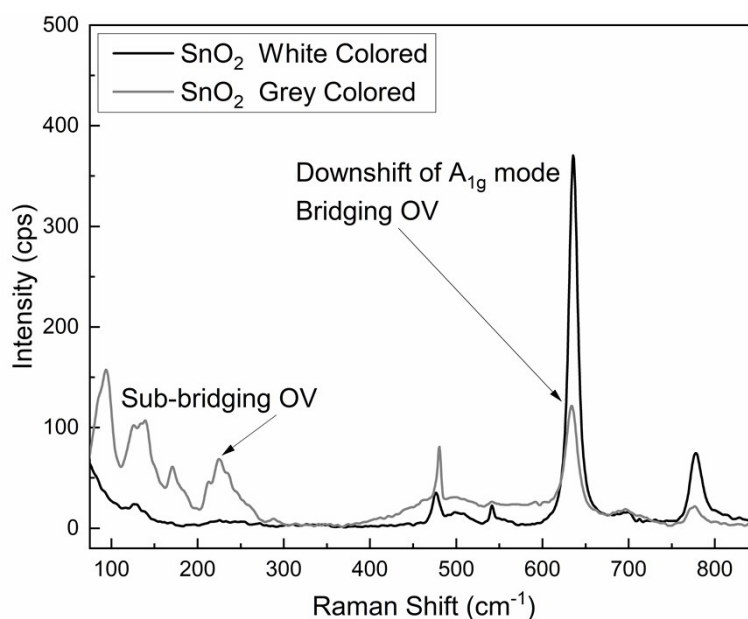

**Fig. S3.** Raman spectra comparing the white and grey colored SnO<sub>2</sub> nanobelts. The measurement shows that in addition to the expected vibrational modes of the SnO<sub>2</sub>, the grey nanobelts present a few peaks attributed to oxygen vacancies.

#### ***SnO nanobelt single-devices nanofabrication***

Fig. S4 shows 6 devices containing a single-SnO nanobelt. Although the devices look to be well connected to the electrodes, none of them presented a considerable signal to noise ratio regarding the resistance measured before and after the NO<sub>2</sub> release.

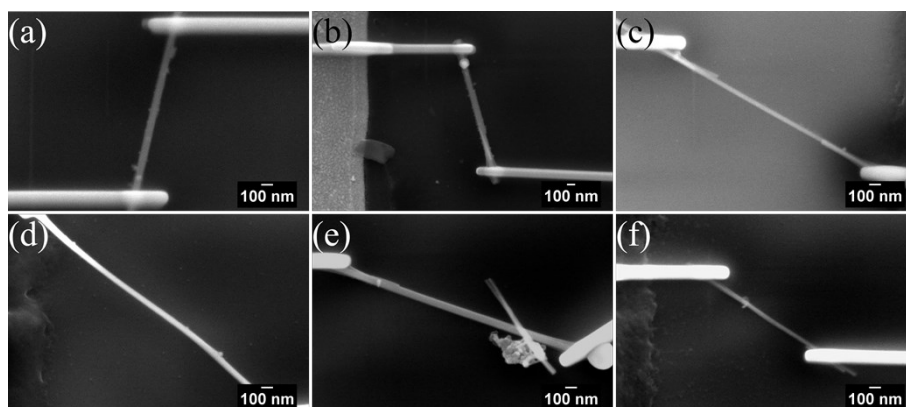

**Fig. S4.** SEM images of the nanofabricated SnO single-nanobelts. Figs a-f correspond to six different nanobelts prepared on distinct electrodes.

### ***XRD of the white and grey colored SnO<sub>2</sub> nanobelts***

Fig. S5 presents the XRD pattern for both white and grey coloured SnO<sub>2</sub>. Even though the Raman measurements shows a higher amount of oxygen vacancies for the grey SnO<sub>2</sub>, the XRD still shows only the *Cassiterite* phase of the SnO<sub>2</sub> (Space group P4<sub>2</sub>/mnm, *Rutile*-type Tetragonal structure, PDF #41-1445).<sup>14,15</sup> This supports the evidence of having oxygen vacancies mainly on the surface, once differently from the Raman technique, the XRD is concerned with the long-range 3D arrangement of atoms.<sup>8</sup>

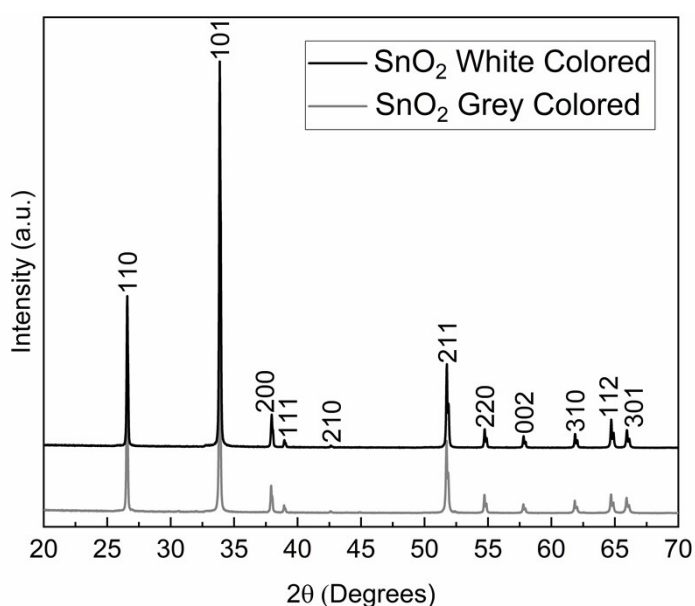

**Fig. S5.** X-ray diffraction pattern (XRD) of the white and grey SnO<sub>2</sub> nanobelts. Both of them presents only the *Cassiterite* phase wherein the planes were indexed.

### ***Self-heated gas sensor measurements using multi-element devices: sensor signal versus temperature.***

During this study, gas sensor measurements were carried out at 150 °C, 200 °C, 250 °C, and 300 °C, all of which used a constant flow of 200 cm<sup>3</sup> min<sup>-1</sup> and similar NO<sub>2</sub> concentrations. Figure S6 presents the sensor signals obtained under 100 ppm NO<sub>2</sub> exposure, showing best response (highest sensor signal) at 150 °C.

Typically, semiconducting metal oxides (SMOs) require relatively high operating temperatures due to the fact that slow kinetics prevents a decent signal-to-noise ratio at room temperature, being the limiting step the charge transfer from the SMO surface to the chemisorbed molecule. On the other hand, temperatures too elevated cause enhanced desorption and no charge transfer occurs at the interface.<sup>16</sup> Besides, carrying on the

measurements at temperatures above 150 °C prevents a thin layer of adsorbed water molecules to cover the SMO surface in case humidity is present, allowing a direct measurement of the sensor signal to NO<sub>2</sub> molecules without any cross-sensitivity.<sup>17</sup>

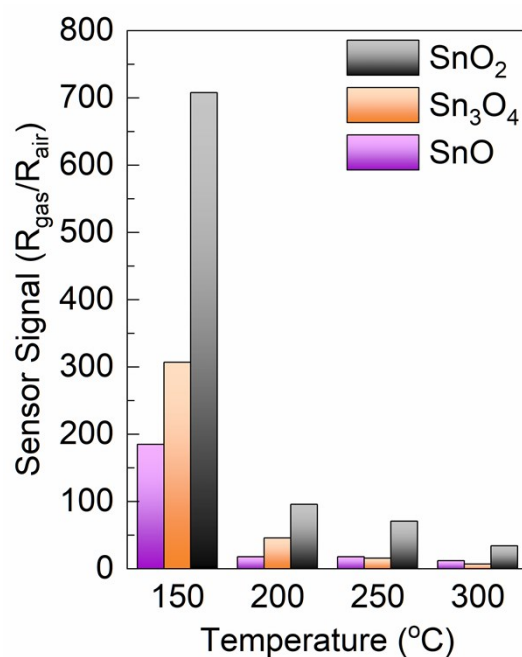

**Fig. S6.** Multi-device (“carpet” mode) sensor signals as a function of temperature for 100 ppm of NO<sub>2</sub>.

The temperatures were reached via self-heated electrodes.

***Self-heated gas sensor measurements using multi-element devices: grey colored SnO<sub>2</sub> nanobelts.***

Finally, Fig. S7 shows the gas sensor measurements using the multi-devices mode. The difference between Fig. S7 and Fig. 6 is that the grey SnO<sub>2</sub> nanobelts is included here. Fig. S7 is used to support the sensor signal trend based on the stoichiometric and reduced surfaces of the Sn-O system, as discussed in the main manuscript.

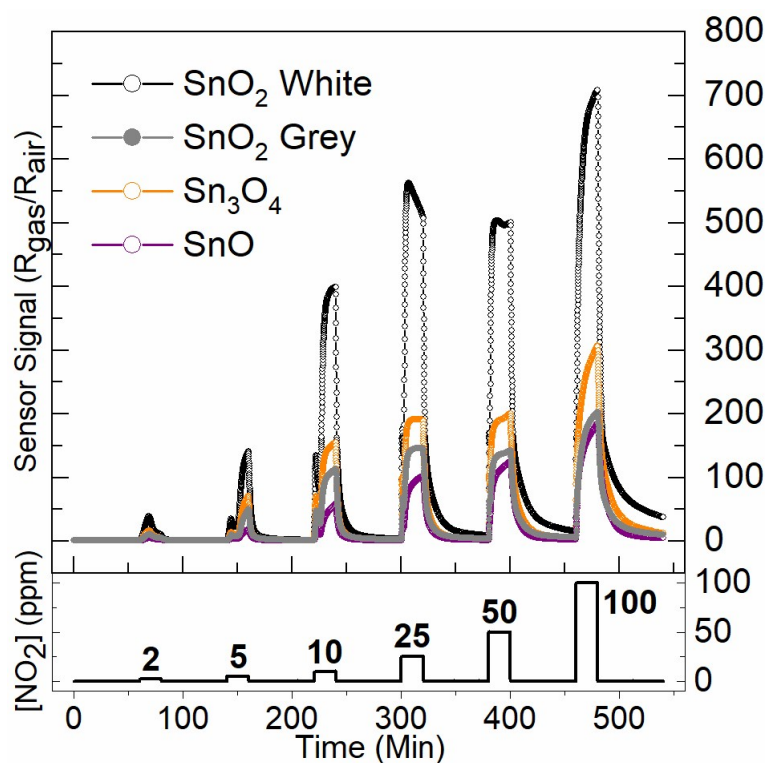

**Fig. S7.** Multi-devices (“carpet” mode) gas sensor measurements showed as sensor signal *versus* analyte gas concentrations ( $[\text{NO}_2]$  from 2 to 100 ppm). Black circles correspond to the white colored  $\text{SnO}_2$ , orange circles to the  $\text{Sn}_3\text{O}_4$ , and purple to the  $\text{SnO}$  nanobelts. In addition to Fig. 6 of the main manuscript, the grey circles show gas sensor signals for the grey coloured  $\text{SnO}_2$ . Sensor signals for the grey  $\text{SnO}_2$  can be found between the  $\text{SnO}$  and the  $\text{Sn}_3\text{O}_4$  NBs. The temperature was kept at 150 °C by self-heated electrodes.

## REFERENCES

- 1 A. Sáenz-Trevizo, P. Amézaga-Madrid, P. Pizá-Ruiz, W. Antúnez-Flores and M. Miki-Yoshida, *Mater. Res.*, 2016, **19**, 33–38.
- 2 R. López and R. Gómez, *J. sol-gel Sci. Technol.*, 2012, **61**, 1–7.
- 3 E. Arslan, S. Bütün, S. B. Lisesivdin, M. Kasap, S. Ozcelik and E. Ozbay, *J. Appl. Phys.*, 2008, **103**, 103701.
- 4 J. D. Prades, F. Hernandez-Ramirez, R. Jimenez-Diaz, M. Manzanares, T. Andreu, A. Cirera, A. Romano-Rodriguez and J. R. Morante, *Nanotechnology*, 2008, **19**, 465501.
- 5 R. Calarco, M. Marso, T. Richter, A. I. Aykanat, R. Meijers, A. vd Hart, T. Stoica and H. Lüth, *Nano Lett.*, 2005, **5**, 981–984.
- 6 Y. W. Li, Y. Li, T. Cui, L. J. Zhang, Y. M. Ma and G. T. Zou, *J. Phys. Condens. Matter*, 2007, **19**, 425230.
- 7 X. Wang, F. X. Zhang, I. Loa, K. Syassen, M. Hanfland and Y. Mathis, *Phys. status solidi*, 2004, **241**, 3168–3178.

- 8 B. Eifert, M. Becker, C. T. Reindl, M. Giar, L. Zheng, A. Polity, Y. He, C. Heiliger and P. J. Klar, *Phys. Rev. Mater.*, 2017, **1**, 14602.
- 9 F. Wang, X. Zhou, J. Zhou, T.-K. Sham and Z. Ding, *J. Phys. Chem. C*, 2007, **111**, 18839–18843.
- 10 O. M. Berengue, R. A. Simon, A. J. Chiquito, C. J. Dalmaschio, E. R. Leite, H. A. Guerreiro and F. E. G. Guimarães, *J. Appl. Phys.*, 2010, **107**, 33717.
- 11 P. H. Suman, A. A. Felix, H. L. Tuller, J. A. Varela and M. O. Orlandi, *Sensors Actuators B Chem.*, 2015, **208**, 122–127.
- 12 M. O. Orlandi, P. H. Suman, R. A. Silva and E. P. S. Arlindo, in *Recent Advances in Complex Functional Materials*, Springer, 2017, pp. 43–67.
- 13 L. Z. Liu, T. H. Li, X. L. Wu, J. C. Shen and P. K. Chu, *J. Raman Spectrosc.*, 2012, **43**, 1423–1426.
- 14 G. J. McCarthy and J. M. Welton, *Powder Diffr.*, 1989, **4**, 156–159.
- 15 Z. M. Jarzebski and J. P. Marton, *J. Electrochem. Soc.*, 1976, **123**, 199C-205C.
- 16 C. Wang, L. Yin, L. Zhang, D. Xiang and R. Gao, *Sensors*, 2010, **10**, 2088–2106.
- 17 A. Helwig, G. Müller, G. Sberveglieri and M. Eickhoff, *J. Sensors*.
